# Supplementary material
Source: PubMed Central journal article supplement (PMC6342192)
Supplement: NIHMS999031-supplement-Tables.pdf [file NIHMS999031-supplement-Tables.pdf]

**Supplementary Table S1. Genes tested for Prostate CTC digital PCR Assay**

| Gene name       | # Primer pairs tested | # primers specific by qPCR | # primers specific by ddPCR | ddPCR signal in mCRPC patients | Status                        |
|-----------------|-----------------------|----------------------------|-----------------------------|--------------------------------|-------------------------------|
| AGR2            | 3                     | 2                          | 1                           | Yes                            | Good primer                   |
| ALDH1A3         | 1                     | 1                          | 1                           | Yes (not robust)               | Good primer                   |
| AMACR           | 6                     | 1                          | -                           | -                              | failed ddPCR specificity test |
| AR              | 6                     | 0                          | -                           | -                              | failed qPCR specificity test  |
| ARG2            | 3                     | 0                          | -                           | -                              | failed qPCR specificity test  |
| ARNTL (BMAL1)   | 2                     | 0                          | -                           | -                              | failed qPCR specificity test  |
| BCL2            | 1                     | 0                          | -                           | -                              | failed qPCR specificity test  |
| CDKN2B-AS1      | 4                     | 1                          | 0                           | -                              | no ddPCR signal in cells      |
| DDX11           | 2                     | 0                          | -                           | -                              | failed qPCR specificity test  |
| ECT2            | 2                     | 0                          | -                           | -                              | failed qPCR specificity test  |
| ENO2            | 4                     | 0                          | -                           | -                              | failed qPCR specificity test  |
| EPCAM (TACSTD1) | 3                     | 1                          | 0                           | -                              | failed ddPCR specificity test |
| ERG             | 2                     | 0                          | -                           | -                              | failed qPCR specificity test  |
| ETV1            | 2                     | 0                          | -                           | -                              | failed qPCR specificity test  |
| FAT1            | 1                     | 1                          | 1                           | Yes                            | Good primer                   |
| FOLH1           | 3                     | 1                          | 1                           | Yes                            | Good primer                   |
| GOLM1           | 3                     | 0                          | -                           | -                              | failed qPCR specificity test  |
| HAL             | 2                     | 0                          | -                           | -                              | failed qPCR specificity test  |
| HOXB13          | 1                     | 1                          | 1                           | Yes                            | Good primer                   |
| IGFBP5          | 2                     | 2                          | 0                           | -                              | failed ddPCR specificity test |
| JUP             | 2                     | 0                          | -                           | -                              | failed qPCR specificity test  |
| KLK2            | 4                     | 4                          | 1                           | Yes                            | Good primer                   |
| KLK3            | 4                     | 1                          | 1                           | Yes                            | Good primer                   |
| KRT18           | 3                     | 0                          | -                           | -                              | failed qPCR specificity test  |
| KRT19           | 2                     | 1                          | 0                           | -                              | failed ddPCR specificity test |
| KRT8            | 5                     | 0                          | -                           | -                              | failed qPCR specificity test  |
| PCA3            | 1                     | 1                          | 0                           | -                              | no ddPCR signal in cells      |
| PCAT1           | 1                     | 1                          | 1                           | No                             | Good primer                   |
| PCGEM1          | 2                     | 1                          | 0                           | -                              | no ddPCR signal in cells      |
| PDLIM5          | 2                     | 0                          | -                           | -                              | failed qPCR specificity test  |
| PDPK1           | 2                     | 0                          | -                           | -                              | failed qPCR specificity test  |
| PLA2G2A         | 1                     | 1                          | -                           | -                              | failed ddPCR specificity test |
| SCHLAP1         | 5                     | 4                          | 0                           | -                              | failed ddPCR specificity test |
| SELENBP1        | 2                     | 1                          | 0                           | -                              | failed ddPCR specificity test |
| SLC45A3         | 2                     | 0                          | -                           | -                              | failed qPCR specificity test  |
| STEAP2          | 2                     | 2                          | 1                           | Yes                            | Good primer                   |
| SUPT7L          | 2                     | 0                          | -                           | -                              | failed qPCR specificity test  |
| TGM4            | 2                     | 2                          | 1                           | Yes (not robust)               | Good primer                   |
| TMPRSS2         | 2                     | 2                          | 1                           | Yes                            | Good primer                   |
| UGT2B15         | 7                     | 2                          | -                           | -                              | failed ddPCR specificity test |
| <b>TOTAL</b>    | <b>106</b>            | <b>34</b>                  | <b>11</b>                   | <b>8</b>                       |                               |

Supplementary Table S2. Clinical information for prostate cancer patients and healthy donor subjects

**Localized Prostate Cancer Patients**

| ID  | Sex  | Age | Initial PSA | cT Stage | Gleason Score (bx) | pT stage | Gleason Score (RP) | Margin status (RP) |
|-----|------|-----|-------------|----------|--------------------|----------|--------------------|--------------------|
| Pr1 | Male | 66  |             | 5.4 T2a  | 3+4                | T2cN0    | 3+4                | -                  |
| Pr2 | Male | 53  |             | 4.4 T1c  | 4+3                | T2cN0    | 3+4                | -                  |
| Pr3 | Male | 57  |             | 9.7 T1c  | 4+3                | T2aNO    | 3+4                | +                  |
| Pr4 | Male | 70  |             | 8.3 T2a  | 4+3                | T3aNO    | 4+3                | -                  |
| Pr5 | Male | 65  |             | 17.0 T1c | 3+4                | T3aNO    | 4+3                | -                  |
| Pr6 | Male | 55  |             | 5.5 T1c  | 3+3                | T2cNx    | 3+4                | -                  |
| Pr7 | Male | 55  |             | 3.4 T1c  | 3+4                | T2cNO    | 3+4                | -                  |
| Pr8 | Male | 58  |             | 6.2 T1c  | 3+3                | T3aNO    | 3+4                | +                  |

**Metastatic Prostate Cancer Patients**

| ID   | Sex  | Age | PSA (at time of CTC draw) | Sites of disease | Prior therapies                                                                                                  |
|------|------|-----|---------------------------|------------------|------------------------------------------------------------------------------------------------------------------|
| Pr9  | Male | 74  | 391.6                     | bone             | RT, ADT, bicalutamide, cabozantinib, abiraterone, radium, docetaxel                                              |
| Pr10 | Male | 79  | 6149.0                    | bone             | RP, RT/bicalutamide, ADT, bicalutamide, abiraterone, radium, docetaxel, enzalutamide                             |
| Pr11 | Male | 55  | 4272.0                    | bone, LNs        | ADT, RP, bicalutamide, RT, ARN509, sipuleucel-T, abiraterone, docetaxel, cabazitaxel, enzalutamide, mitoxantrone |
| Pr12 | Male | 73  | 861.9                     | bone             | RT/ADT, ADT, bicalutamide, sipuleucel-T, abiraterone, docetaxel, enzalutamide, cabazitaxel                       |
| Pr13 | Male | 64  | 6.8                       | bone             | ADT, abiraterone, docetaxel, cabazitaxel                                                                         |
| Pr14 | Male | 67  | 15.3                      | bone             | bicalutamide, ADT, abiraterone, docetaxel, radium                                                                |
| Pr15 | Male | 89  | 17.7                      | bone, LNs        | ADT, bicalutamide, abiraterone, enzalutamide, radium                                                             |
| Pr16 | Male | 68  | 5.6                       | bone             | RP, RT/ADT, ADT, abiraterone                                                                                     |
| Pr17 | Male | 65  | 41.5                      | bone, LNs        | ADT/RT, abiraterone, enzalutamide                                                                                |
| Pr18 | Male | 64  | 104.6                     | bone, LNs        | ADT, bicalutamide, abiraterone, enzalutamide, radium                                                             |
| Pr19 | Male | 70  | 772.3                     | bone             | none                                                                                                             |
| Pr20 | Male | 67  | 13.2                      | bone, LNs        | ADT                                                                                                              |
| Pr21 | Male | 85  | 1.85                      | bone             | ADT, abiraterone                                                                                                 |
| Pr22 | Male | 68  | 43.27                     | bone, LNs        | ADT, RT, docetaxel, abiraterone                                                                                  |
| Pr23 | Male | 68  | 474.20                    | bone, LNs        | ADT, bicalutamide, sipuleucel-T, abiraterone, enzalutamide, RT                                                   |
| Pr24 | Male | 85  | 140.50                    | bone             | ADT, bicalutamide, denosumab, abiraterone, enzalutamide                                                          |
| Pr25 | Male | 74  | 98.58                     | bone             | ADT, abiraterone, galaterone, docetaxel, radium, RT, cabazitaxel                                                 |
| Pr26 | Male | 61  | 0.59                      | bone             | ADT, abiraterone                                                                                                 |
| Pr27 | Male | 67  | 1.81                      | bone             | ADT, abiraterone                                                                                                 |
| Pr28 | Male | 57  | <0.1                      | bone             | ADT, abiraterone                                                                                                 |
| Pr29 | Male | 65  | 99.27                     | bone, LNs        | ADT, abiraterone                                                                                                 |

**Healthy Donor Subjects**

| ID     | Sex    | Age |
|--------|--------|-----|
| HDF1   | Female | 53  |
| HDF2   | Female | 54  |
| HDF3   | Female | 54  |
| HDF4   | Female | 62  |
| HDF5   | Female | 73  |
| HDMY1  | Male   | 37  |
| HDMY2  | Male   | 41  |
| HDMY3  | Male   | 43  |
| HDMY4  | Male   | 44  |
| HDMY5  | Male   | 45  |
| HDMY6  | Male   | 29  |
| HDMY7  | Male   | 40  |
| HDMY8  | Male   | 24  |
| HDMY9  | Male   | 32  |
| HDMY10 | Male   | 41  |
| HDMY11 | Male   | 25  |
| HDMY12 | Male   | 43  |
| HDMY13 | Male   | 23  |
| HDMY14 | Male   | 23  |
| HDMY15 | Male   | 31  |
| HDMO1  | Male   | 53  |
| HDMO2  | Male   | 53  |
| HDMO3  | Male   | 54  |
| HDMO4  | Male   | 54  |
| HDMO5  | Male   | 62  |
| HDMO6  | Male   | 63  |
| HDMO7  | Male   | 63  |
| HDMO8  | Male   | 63  |
| HDMO9  | Male   | 68  |
| HDMO10 | Male   | 68  |
| HDMO11 | Male   | 68  |
| HDMO12 | Male   | 69  |
| HDMO13 | Male   | 69  |
| HDMO14 | Male   | 72  |
| HDMO15 | Male   | 72  |
| HDMO16 | Male   | 73  |
| HDMO17 | Male   | 73  |
| HDMO18 | Male   | 58  |
| HDMO19 | Male   | 53  |

**Supplementary Table S3. Clinical information for patients enrolled on prospective trial of first-line abiraterone for mCRPC**

| ID    | Sex  | Age | Sites of disease         | High Disease Burden* | PSA at C1D1 | PSA at C4D1 | PSA nadir | Prior therapies   |
|-------|------|-----|--------------------------|----------------------|-------------|-------------|-----------|-------------------|
| PrA1  | Male | 67  | bone                     | Y                    | 3.52        | 4.39        | 2.70      | ADT               |
| PrA2  | Male | 67  | LN                       | N                    | 41.73       | 2.66        | 0.20      | ADT, metformin    |
| PrA3  | Male | 62  | bone                     | Y                    | 194.50      | 2.26        | 1.89      | ADT               |
| PrA4  | Male | 68  | bone                     | Y                    | 163.20      | 98.34       | 89.35     | ADT               |
| PrA5  | Male | 48  | bone                     | N                    | 3.91        | 24.80       | NA        | ADT               |
| PrA6  | Male | 78  | bone, LN                 | Y                    | 43.59       | 43.59       | 36.54     | ADT               |
| PrA7  | Male | 71  | LN                       | N                    | 3.39        | 0.87        | 0.37      | ADT, bicalutamide |
| PrA8  | Male | 67  | LN                       | N                    | 45.27       | 3.45        | 3.91      | ADT               |
| PrA9  | Male | 63  | bone                     | Y                    | 50.77       | 0.34        | 0.28      | ADT               |
| PrA10 | Male | 85  | bone                     | Y                    | 108.60      | 428.60      | 104.90    | ADT               |
| PrA11 | Male | 80  | bone                     | N                    | 20.35       | 5.41        | 0.98      | ADT               |
| PrA12 | Male | 78  | bone, LN, adrenal nodule | Y                    | 34.03       | 101.10      | NA        | ADT               |
| PrA13 | Male | 68  | bone                     | N                    | 4.69        | 2.67        | 2.49      | ADT               |
| PrA14 | Male | 85  | bone                     | Y                    | 21.03       | 20.45       | 14.22     | ADT, bicalutamide |
| PrA15 | Male | 83  | bone                     | Y                    | 172.30      | 30.64       | 8.26      | ADT               |
| PrA16 | Male | 87  | bone, LN                 | Y                    | 5.23        | 1.73        | 1.59      | ADT               |
| PrA17 | Male | 72  | bone, local              | N                    | 14.28       | 9.23        | 3.74      | ADT               |
| PrA18 | Male | 75  | bone, LN                 | Y                    | 151.20      | 451.10      | 120.6     | ADT, bicalutamide |
| PrA19 | Male | 67  | LN                       | N                    | 31.48       | 0.25        | <0.10     | ADT               |
| PrA20 | Male | 85  | bone                     | Y                    | 5.77        | 8.78        | 5.96      | ADT               |
| PrA21 | Male | 78  | bone, LN                 | Y                    | 37.40       | 23.35       | 6.74      | ADT               |
| PrA22 | Male | 78  | bone                     | N                    | 3.19        | 1.89        | 0.67      | ADT, bicalutamide |
| PrA23 | Male | 71  | LN                       | N                    | 9.04        | 0.56        | 0.56      | ADT, bicalutamide |
| PrA24 | Male | 66  | LN                       | N                    | 8.77        | 5.48        | 3.24      | ADT, bicalutamide |
| PrA25 | Male | 73  | bone                     | Y                    | 26.62       | 10.24       | 7.66      | ADT+docetaxel     |
| PrA26 | Male | 76  | bone                     | N                    | 15.17       | 6.75        | 2.42      | ADT, bicalutamide |
| PrA27 | Male | 58  | bone                     | N                    | 9.00        | 0.38        | 0.38      | ADT               |

\*High disease burden defined as >4 bone metastases, at least one outside pelvis/spine (per CHARTED trial), or visceral metastases.

Supplementary Table S4. Clinical information for patients with localized prostate cancer in radical prostatectomy study

| ID     | Sex  | Age | D'Amico Risk Group | UCSF-CAPRA | cT Stage | WHO Grade Group (bx) | Gleason Score (bx) | %Cores Involved | Initial PSA | Pre-op Imaging     | pT Stage | pN Stage | WHO Grade Group (RP) | Gleason Score (RP) | Margin Status (RP) |
|--------|------|-----|--------------------|------------|----------|----------------------|--------------------|-----------------|-------------|--------------------|----------|----------|----------------------|--------------------|--------------------|
| PrRP1  | Male | 49  | Low                | 0          | T1c      | 1                    | 6                  | 17%             | 4.76        | None               | T2c      | Nx       | 1                    | 6                  | Negative           |
| PrRP2  | Male | 51  | Low                | 1          | T1c      | 1                    | 6                  | 33%             | 3.21        | None               | T2c      | Nx       | 1                    | 6                  | Negative           |
| PrRP3  | Male | 56  | Low                | 1          | T2a      | 1                    | 6                  | 25%             | 3.47        | MRI                | T3a      | N0       | 1                    | 6                  | Negative           |
| PrRP4  | Male | 57  | Low                | 1          | T2c      | 1                    | 6                  | 17%             | 4.25        | MRI                | T2c      | N0       | 1                    | 3+3 (+4)           | Negative           |
| PrRP5  | Male | 55  | Low                | 2          | T1c      | 1                    | 6                  | 75%             | 5.17        | None               | T2b      | Nx       | 2                    | 3+4                | Negative           |
| PrRP6  | Male | 51  | Low                | 2          | T1c      | 1                    | 6                  | 42%             | 5.1         | None               | T2c      | Nx       | 1                    | 6                  | Negative           |
| PrRP7  | Male | 61  | Low                | 2          | T1c      | 1                    | 6                  | 33%             | 6.58        | MRI                | T3a      | Nx       | 2                    | 3+4                | Positive           |
| PrRP8  | Male | 67  | Low                | 2          | T1c      | 1                    | 6                  | 67%             | 3.92        | MRI                | T3a      | N0       | 2                    | 3+4                | Positive           |
| PrRP9  | Male | 61  | Low                | 2          | T2b      | 1                    | 6                  | 58%             | 4.36        | None               | T2c      | N0       | 1                    | 6                  | Negative           |
| PrRP10 | Male | 52  | Low                | 3          | T1c      | 1                    | 6                  | 67%             | 6.15        | MRI                | T2c      | N0       | 2                    | 3+4                | Negative           |
| PrRP11 | Male | 69  | Intermediate       | 2          | T1c      | 2                    | 3+4                | 8%              | 4.38        | MRI                | T2a      | N0       | 2                    | 3+4                | Negative           |
| PrRP12 | Male | 52  | Intermediate       | 2          | T2a      | 2                    | 3+4                | 17%             | 5.29        | MRI                | T3a      | N0       | 5                    | 4+5                | Negative           |
| PrRP13 | Male | 57  | Intermediate       | 3          | T1c      | 2                    | 3+4                | 50%             | 4.5         | MRI                | T2c      | N0       | 1                    | 6                  | Negative           |
| PrRP14 | Male | 52  | Intermediate       | 3          | T1c      | 2                    | 3+4                | 100%            | 2.25        | MRI, Bone scan     | T2c      | N0       | 1                    | 6                  | Negative           |
| PrRP15 | Male | 65  | Intermediate       | 3          | T1c      | 2                    | 3+4                | 50%             | 5.23        | MRI                | T2c      | N0       | 2                    | 3+4                | Negative           |
| PrRP16 | Male | 63  | Intermediate       | 3          | T1c      | 2                    | 3+4                | 67%             | 5.32        | None               | T2c      | N0       | 2                    | 3+4                | Negative           |
| PrRP17 | Male | 63  | Intermediate       | 3          | T2a      | 2                    | 3+4                | 42%             | 4.85        | MRI                | T3a      | N0       | 2                    | 3+4                | Negative           |
| PrRP18 | Male | 80  | Intermediate       | 4          | T2b      | 1                    | 6                  | 50%             | 17.71       | MRI                | T3a      | N0       | 2                    | 3+4                | Negative           |
| PrRP19 | Male | 68  | Intermediate       | 4          | T1c      | 2                    | 3+4                | 8%              | 10.5        | MRI                | T2c      | N0       | 1                    | 3+3 (+4)           | Negative           |
| PrRP20 | Male | 57  | Intermediate       | 4          | T1c      | 2                    | 3+4                | 50%             | 6.82        | MRI, CT, Bone scan | T3a      | N0       | 2                    | 3+4                | Positive           |
| PrRP21 | Male | 55  | Intermediate       | 4          | T2b      | 2                    | 3+4                | 8%              | 12.21       | MRI, CT, Bone scan | T3b      | N1       | 3                    | 4+3                | Negative           |
| PrRP22 | Male | 63  | Intermediate       | 5          | T1c      | 3                    | 4+3                | 42%             | 5.38        | MRI                | T3a      | N1       | 2                    | 3+4                | Negative           |
| PrRP23 | Male | 73  | Intermediate       | 5          | T2a      | 3                    | 4+3                | 58%             | 4.97        | MRI, CT, Bone scan | T3b      | N0       | 5                    | 4+5                | Negative           |
| PrRP24 | Male | 68  | Intermediate       | 6          | T1c      | 3                    | 4+3                | 33%             | 15.1        | MRI, CT, Bone scan | T2c      | N0       | 3                    | 4+3                | Negative           |
| PrRP25 | Male | 74  | Intermediate       | 6          | T1c      | 3                    | 4+3                | 33%             | 13.3        | CT, Bone scan      | T2c      | N0       | 2                    | 3+4                | Negative           |
| PrRP26 | Male | 70  | High               | 2          | T1c      | 4                    | 3+5                | 33%             | 5.35        | MRI, Bone scan     | T3a      | N0       | 2                    | 3+4 (+5)           | Negative           |
| PrRP27 | Male | 53  | High               | 4          | T1c      | 1                    | 6                  | 17%             | 26.23       | None               | T2c      | N0       | 2                    | 3+4                | Negative           |
| PrRP28 | Male | 66  | High               | 5          | T1c      | 1                    | 6                  | 8%              | 65.25       | MRI, Bone scan     | T2c      | N0       | 2                    | 3+4                | Negative           |
| PrRP29 | Male | 68  | High               | 5          | T2a      | 4                    | 4+4                | 33%             | 1.27        | MRI, CT, Bone scan | T2a      | N0       | 4                    | 4+4                | Negative           |
| PrRP30 | Male | 64  | High               | 6          | T1c      | 4                    | 4+4                | 42%             | 2.55        | MRI                | T2a      | N0       | 3                    | 4+3                | Negative           |
| PrRP31 | Male | 54  | High               | 6          | T1c      | 4                    | 4+4                | 42%             | 5.02        | MRI, CT, Bone scan | T2c      | N0       | 5                    | 4+5                | Negative           |
| PrRP32 | Male | 72  | High               | 7          | T3b      | 5                    | 4+5                | 42%             | 3.67        | MRI, CT, Bone scan | T3b      | N0       | 5                    | 4+5                | Positive           |
| PrRP33 | Male | 69  | High               | 8          | T2b      | 3                    | 4+3                | 83%             | 25.31       | MRI, CT, Bone scan | T3b      | N1       | 5                    | 5+4                | Positive           |
| PrRP34 | Male | 50  | High               | 8          | T2b      | 4                    | 4+4                | 92%             | 11.27       | MRI, CT, Bone scan | T3b      | N1       | 5                    | 4+5                | Positive           |

**Supplementary Table S5. Droplet digital PCR primers used in this study.**

| Gene                       | Forward 5'→3'                         | Reverse 5'→3'                        | Probe 5'→3'                            |
|----------------------------|---------------------------------------|--------------------------------------|----------------------------------------|
| TMPRSS2                    | TCA ATG AGA<br>AGC ACC TTG<br>GC      | CCC AAC CCA GGC<br>ATG ATG           | ACC CGG AAA CC AGC<br>AGA GCT          |
| FAT1                       | ATC AGC AGA<br>GTC AAT CAG<br>TGA G   | GAT CCT TAT GCC ATC<br>ACC GT        | TCT TGT CAG CAG CGT<br>TCC CGG         |
| KLK2                       | GTC TTC AGG<br>CTC AAA CAG GT         | GCT GTG TAC AGT CAT<br>GGA TGG       | TGG CTA TTC TTC TTT<br>AGG CAA TGG GCA |
| STEAP2                     | TCT CCA AAC<br>TTC TTC CTC<br>ATT CC  | CAT GTT GCC TAC AGC<br>CTC T         | ACA TGG CTT ATC AGC<br>AGG TTC ATG CA  |
| KLK3                       | GTG TGC TGG<br>ACG CTG GA             | GTG ATA CCT TGA AGC<br>ACA CCA TTA C | AAA GCA CCT GCT CGG<br>GTG ATT CT      |
| HOXB13                     | CTG TAC GGA<br>ATG CGT TTC<br>TTG     | CAG CCA GAT GTG TTG<br>CCA           | CAG CAT TTG CAG ACT<br>CCA GCG G       |
| AGR2                       | CAA TTC AGT<br>CTT CAG CAA<br>CTT GAG | CTG ACA GTT AGA GCC<br>GAT ATC AC    | ATG CTT ACG AAC CTG<br>CAG ATA CAG CTC |
| FOLH1                      | TGT TCC AAA<br>GCT CCT CAC AA         | CAA TGT GAT AGG TAC<br>TCT CAG AGG   | ATG AAC AAC AGC TGC<br>TCC ACT CTG A   |
| AR-V7                      | CTT GTC GTC<br>TTC GGA AAT<br>GTT ATG | CTT TCT TCA GGG TCT<br>GGT CAT T     | AAG CAG GGA TGA CTC<br>TGG GAG AAA     |
| TMPRSS2:ERG<br>(ddPCR)     | GAG TAG GCG<br>CGA GCT AAG            | CGT AGG CAC ACT CAA<br>ACA AC        | CGG CAG GAA GCC TTA<br>TCA GTT GTG A   |
| TMPRSS:ERG<br>(nested STA) | GAG TAG GCG<br>CGA GCT AAG            | GGC TCA TCT TGG AAG<br>TCT GT        | None                                   |
